# Supplementary material for: Evaluation of the anti-tumor effects of lactate dehydrogenase inhibitor galloflavin in endometrial cancer cells
Source: PubMed Central journal article supplement (PMC4316809; doi:10.1186/s13045-014-0097-x), 2015-01-29

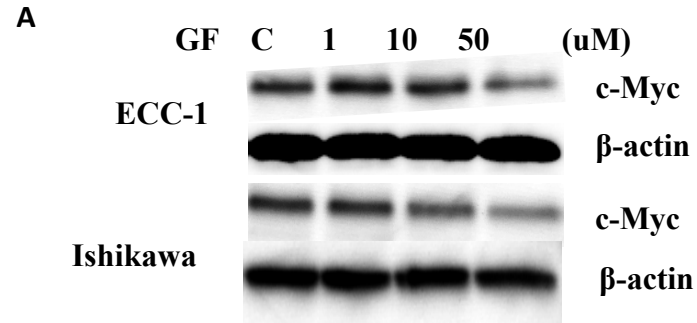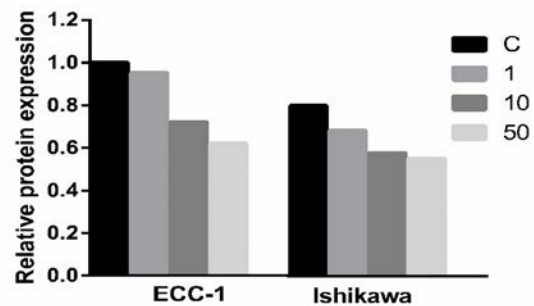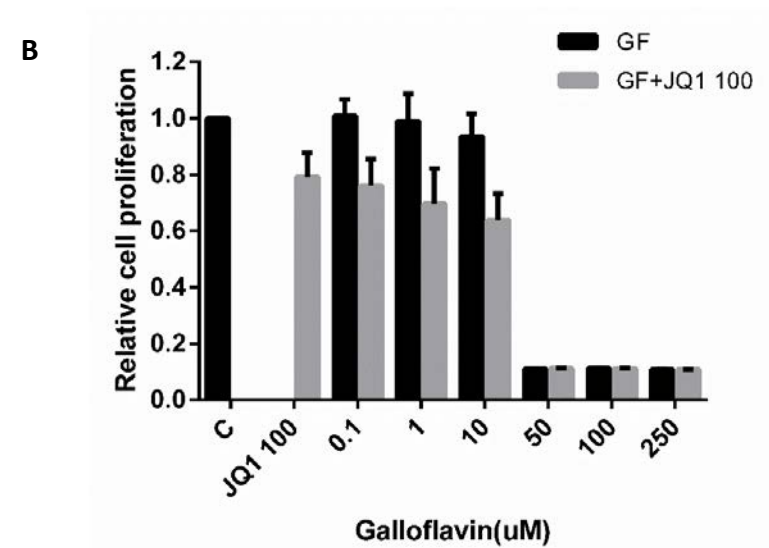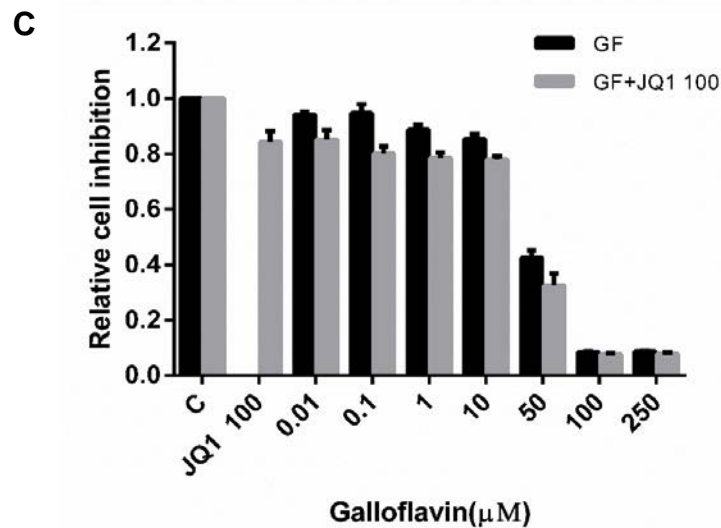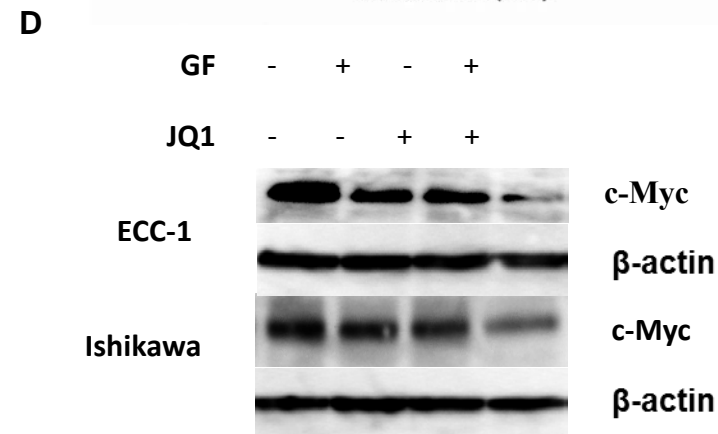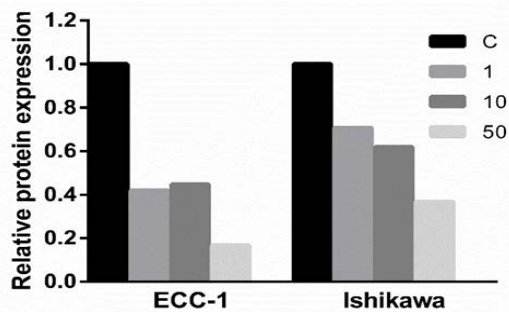

E

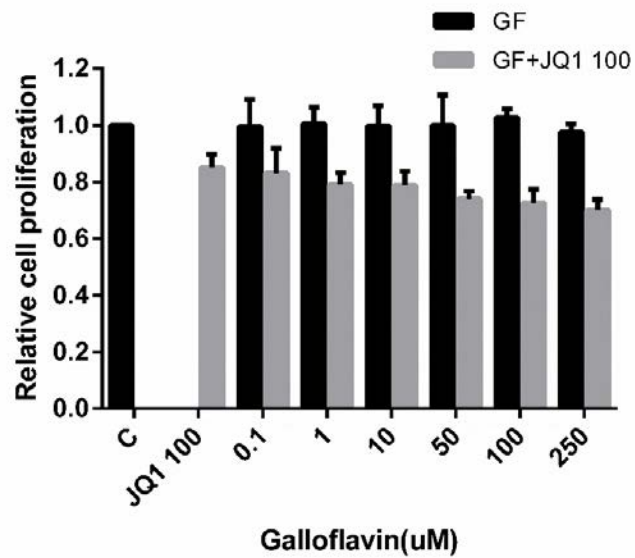

F

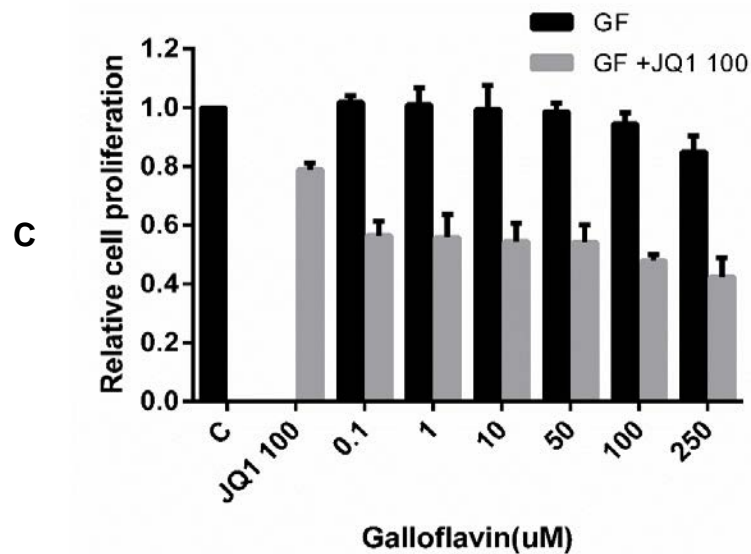

C

G

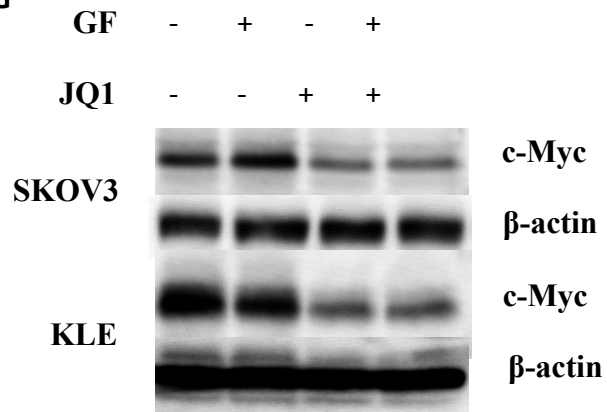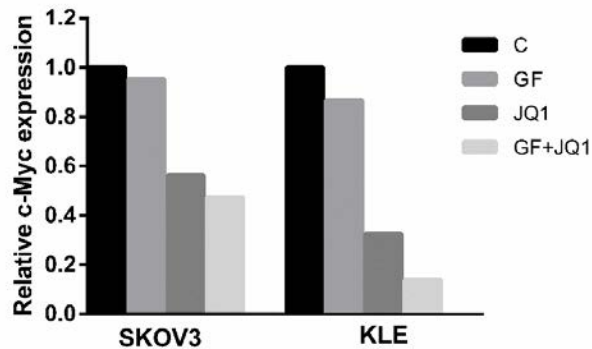

Supplement: 13045_2014_97_MOESM7_ESM.pdf [file 13045_2014_97_MOESM7_ESM.pdf]
